# Supplementary material for: Horizontal and Vertical Transmission of a Mycovirus Closely Related to the Partitivirus RhsV717 That Confers Hypovirulence in Rhizoctonia solani
Source: MDPI journal article supplement (doi:10.3390/v15102088), 2023-10-13
Supplement: s1 [file s1]

**Table S1.** Primers used for amplifying the middle fragment sequences, 5' and 3' terminal sequences of cDNA from RsPV-BS5 genome in this study.

| Function                                           | Primer name | Primer sequence (5'-3')                                      |
|----------------------------------------------------|-------------|--------------------------------------------------------------|
| Synthesize genome middle fragment cDNA of RsPV-BS5 | B1-64F      | ATAATACAAGTCCCGAGC                                           |
|                                                    | B1-64R      | TAAAAAAACAGCAAACAA                                           |
|                                                    | B2-64F      | CAAAGGCTATCTACCACA                                           |
|                                                    | B2-64R      | ATATACATAACGCAAGGA                                           |
|                                                    | B3-64F      | ACAAACTCTCAACTCTCG                                           |
|                                                    | B3-64R      | TTTATGGTAATCACGGAA                                           |
|                                                    | B4-52F      | ACCCAAGCAACAAGAACT                                           |
|                                                    | B4-52R      | TGAAGAATCGATTGAACA                                           |
|                                                    | B5-52F      | ACTTCACTGCTACTTGGT                                           |
|                                                    | B5-52R      | AGGAGATGTTATTTTCGTT                                          |
|                                                    | B6-52F      | TTACGAACGAACTCTCCT                                           |
|                                                    | B6-52R      | TTAATTGCATTTCTATGA                                           |
| RsPV-BS5 genome terminal specific primers          | 64-3F1      | CGCGCCGAGAACACGTA                                            |
|                                                    | PC2         | CCGAATTCCCGGGATCC                                            |
|                                                    | 64-3F2      | CCACGAGACGACGCTGA                                            |
|                                                    | PC2         | CCGAATTCCCGGGATCC                                            |
|                                                    | PC2         | CCGAATTCCCGGGATCC                                            |
|                                                    | 64-5R1      | AAGACGGACGGGGATGG                                            |
|                                                    | PC2         | CCGAATTCCCGGGATCC                                            |
|                                                    | 64-5R2      | CGGCGGCGTTGTTGTAG                                            |
|                                                    | PC2         | CCGAATTCCCGGGATCC                                            |
|                                                    | 52-5R1      | TTGAGAGGCGAAGAGCG                                            |
|                                                    | PC2         | CCGAATTCCCGGGATCC                                            |
|                                                    | 52-5R2      | TAGTACCAGCGGGGCGG                                            |
|                                                    | 52-3F1      | CGCTACTGCCTCAAACG                                            |
|                                                    | PC2         | CCGAATTCCCGGGATCC                                            |
|                                                    | 52-3F2      | AGCCTACGCCTCATGTGC                                           |
|                                                    | PC2         | CCGAATTCCCGGGATCC                                            |
| PC3-T7 loop primer                                 | PC3-T7      | P-GGATCCCGGGAATTCGTAATACGACTCACTA-TATTTTATAGTGAGTCGTATTA-NH2 |

**Table S2.** Specific primers used for amplifying the genome of RsPV-BS5.

| Function         | Primer name | Primer sequence (5'-3') | target fragment |
|------------------|-------------|-------------------------|-----------------|
| specific primers | 64F2        | TGAGAAGTGTTTGATCCA      | 498bp           |
|                  | 64R2        | CATAATACAAGTCCCGAG      |                 |
|                  | 52F1        | TACGCAGAGAAACCAACC      | 266bp           |
|                  | 52R1        | TACGCAGAGAAACCAACC      |                 |
|                  | BS5CP-F     | CCAGTTCTATTCCGTGA       | 835bp           |
|                  | BS5CP-R     | GCGAAGCATTTCCATTT       |                 |

**Table S3.** The information of full-length genomic sequences and their ORF1 and ORF2-encoded proteins aa sequence identity comparison with that of Rhizoctonia solani virus 717 (RshV717) in this study by BLASTn and BLASTp of NCBI.

| Virus Name                                           | GenBank Accession Number | Nuclein ic acid acid sequence comparison |                |                                                              | Amino acid comparison |                |                                                            |
|------------------------------------------------------|--------------------------|------------------------------------------|----------------|--------------------------------------------------------------|-----------------------|----------------|------------------------------------------------------------|
|                                                      |                          | Genome size (nt)                         | query coverage | Nuclein ic acid acid sequence identity to RhsV717 RdRp or CP | Amino acid (aa)       | query coverage | Amino acid sequence identity to RhsV717 RdRp or CP protein |
| Rhizoctonia solani partitivirus BS-5 (RsPV-BS5) RdRp | OK392630                 | 2580                                     | 92%%           | 93.82%                                                       | 730                   | 100%           | 98.64%                                                     |
| Rhizoctonia solani partitivirus BS-5 (RsPV-BS5) CP   | OK392631                 | 2444                                     | 90%            | 93.77%                                                       | 683                   | 100%           | 96.34%                                                     |

**Table S4.** Compare the data with the reference genome (*R. solani*).

| sample      | total_reads | total_map        | unique_map       |
|-------------|-------------|------------------|------------------|
| P06_2_15V_1 | 46512008    | 40153252(86.33%) | 39362179(84.63%) |
| P06_2_15V_2 | 46506662    | 39875417(85.74%) | 39201621(84.29%) |
| P06_2_15V_3 | 40661702    | 34962319(85.98%) | 34261712(84.26%) |
| P06_2_15_1  | 44920418    | 38554254(85.83%) | 37913867(84.4%)  |
| P06_2_15_2  | 44169000    | 38111450(86.29%) | 37232173(84.29%) |
| P06_2_15_3  | 42904144    | 37083717(86.43%) | 36351539(84.73%) |

**File S1.** Gene Ontology and KEGG pathway enrichment analysis.

After RsPV-BS5 infected strain 06-2-15, the differential genes were mainly involved in protein binding and activation, such as ribonucleoside and nucleoside binding (GO: 0032549 and GO: 0001882) and carboxyl lyase activity (GO: 0016830). In terms of cell composition, differential genes were mainly involved in the formation of cell membranes, such as the overall assembly of cell membranes (GO:0016021), the intrinsic components of cell membranes (GO:0031224), and the components of cell membranes (GO:0044425).

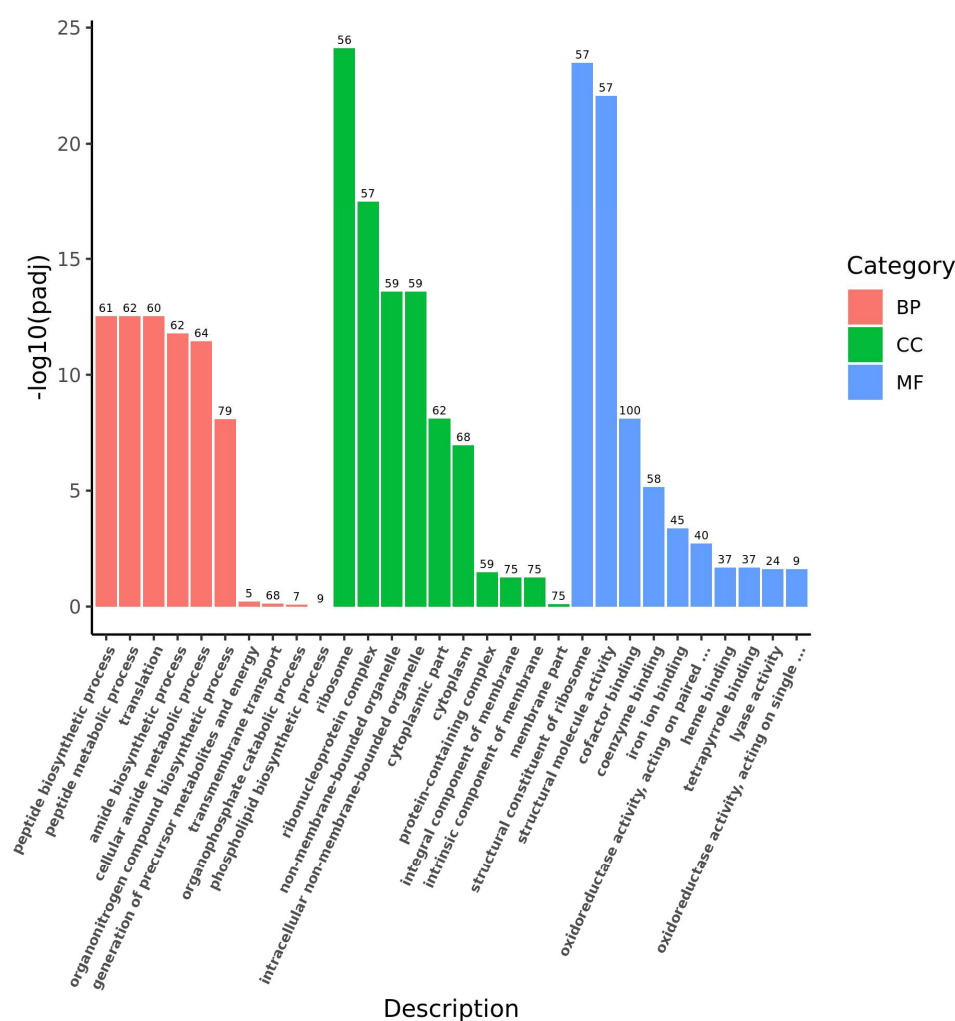

**Figure S1.** Histogram of GO functional enrichment. Horizontal Coordinate((X-axis)) represents the GO terms, which were categories used to describe the functions of genes and gene products; Vertical Coordinate((Y-axis)) represents the significance level of GO term enrichment, often represented as  $-\log_{10}(\text{padj})$ . The higher the value on the Y-axis, the more significant the enrichment of that GO term in the dataset.

Kyoto Encyclopedia of Genes and Genomes (KEGG) was a comprehensive database integrating genomic, chemical and system function information. For KEGG pathway enrichment,  $\text{padj}$  less than or equal to 0.05 was taken as the threshold for significant enrichment, and the 20 most significant KEGG pathways were selected in Figure 1-2. The biosynthesis of secondary metabolites (abv01110), ribosomes (abv03010) and amino acids (abv01230) are the top three metabolic pathways. In addition, glycolysis and glucose metabolism synthesis (abv00010), glutathione metabolism (abv00480), alanine, aspartate and glutamate metabolism (abv00250) and tyrosine metabolism (abv00350) were also enriched.

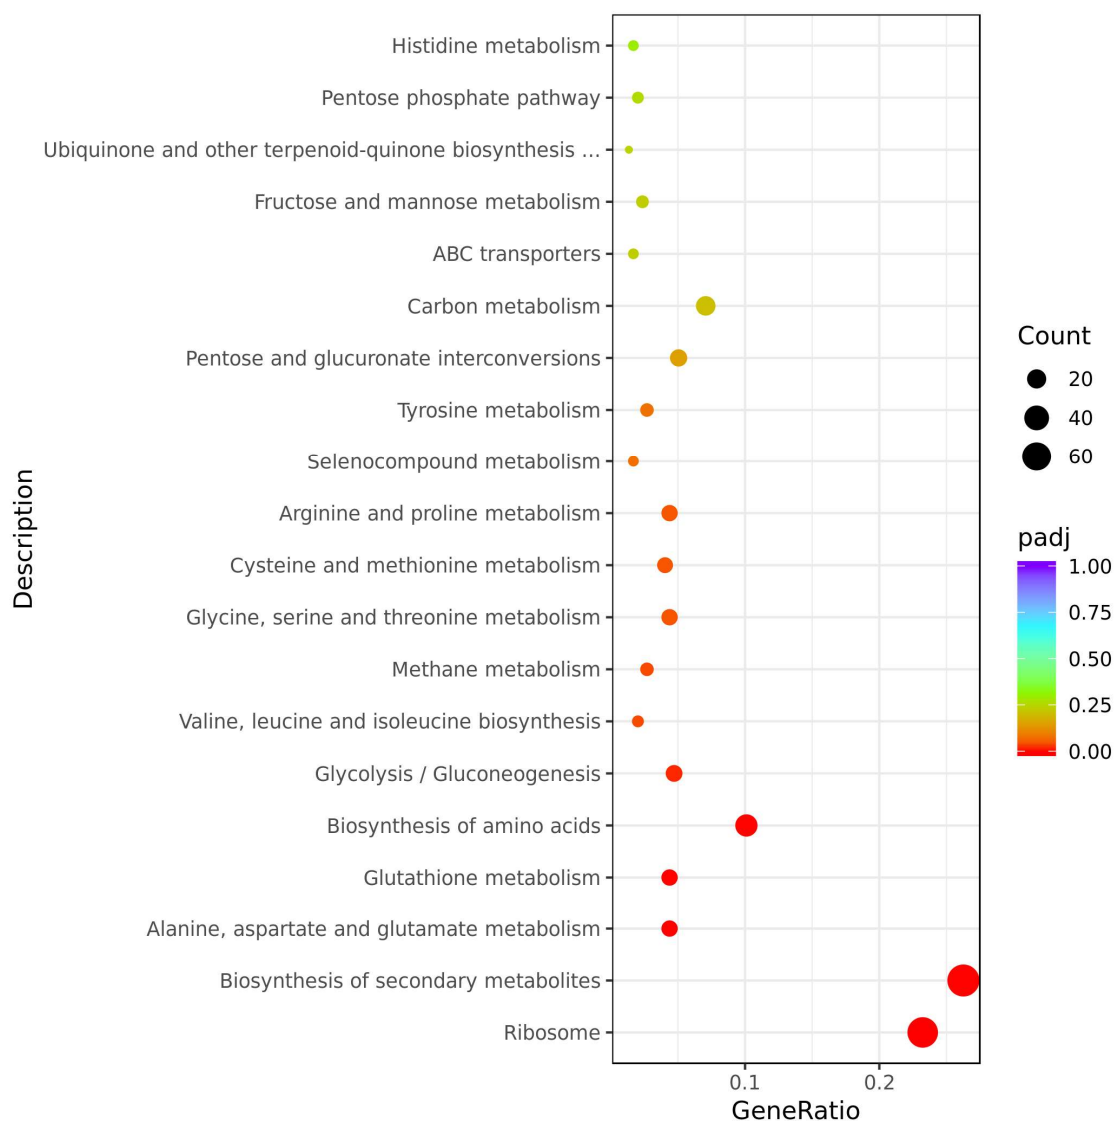

**Figure S2.** Pathway diagram of KEGG metabolism enrichment. Horizontal coordinate represents the ratio of the number of differential genes that are annotated to a specific KEGG pathway to the total number of differential genes in your dataset; Vertical coordinate represents the KEGG pathways themselves, each KEGG pathway corresponds to a specific biological pathway or network of genes involved in a particular cellular process, such as tyrosine metabolism.
